# Supplementary material for: Highly Stable Porous Polyimide Sponge as a Separator for Lithium-Metal Secondary Batteries
Source: MDPI journal article supplement (doi:10.3390/nano10101976), 2020-10-06
Supplement: s1 [file s1]

# Supplementary Materials: Highly stable porous polyimide sponge as a separator for lithium-metal secondary batteries

Junyoung Choi <sup>1,2,3,†</sup>, Kwansoo Yang <sup>2,3,†</sup>, Hyeon-Su Bae <sup>1</sup>, Isheunesu Phiri <sup>1</sup>, Hyun Jeong Ahn <sup>2,3</sup>, Jong Chan Won <sup>2,3</sup>, Yong Min Lee <sup>4,\*</sup>, Yun Ho Kim <sup>2,3,\*</sup> and Myung-Hyun Ryou <sup>1,\*</sup>

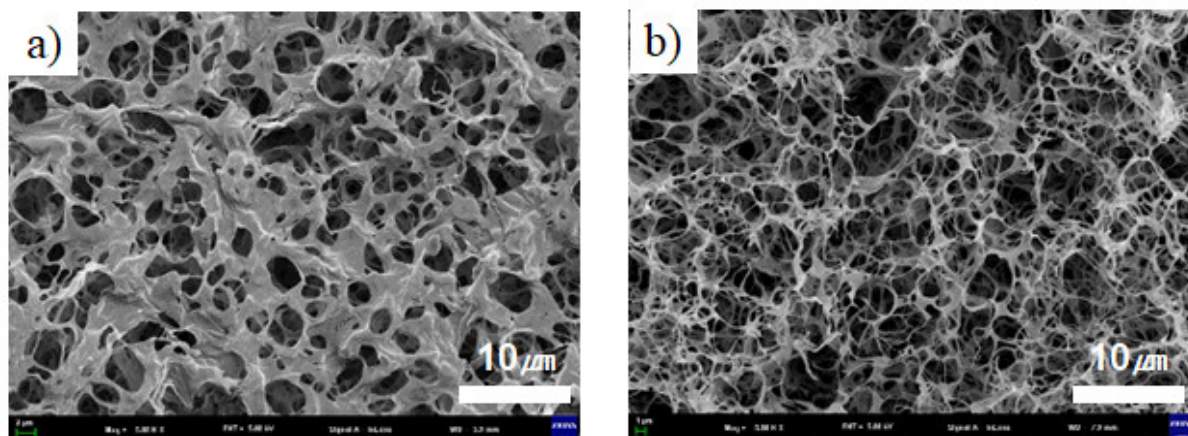

**Figure S1.** (a) Surface and (b) cross-sectional scanning-electron microscopy (SEM) images of PI sponge before pressing.

**Table 1.** Mercury porosimetry (AutoPore V) analysis of PI sponge before pressing.

| Porosity (%) | Bulk density (g mL <sup>-1</sup> ) | Apparent density (g mL <sup>-1</sup> ) | Median pore diameter (μm) | Average pore diameter (μm) |
|--------------|------------------------------------|----------------------------------------|---------------------------|----------------------------|
| 94.9         | 0.0153                             | 0.4810                                 | 0.19766                   | 4.5998                     |

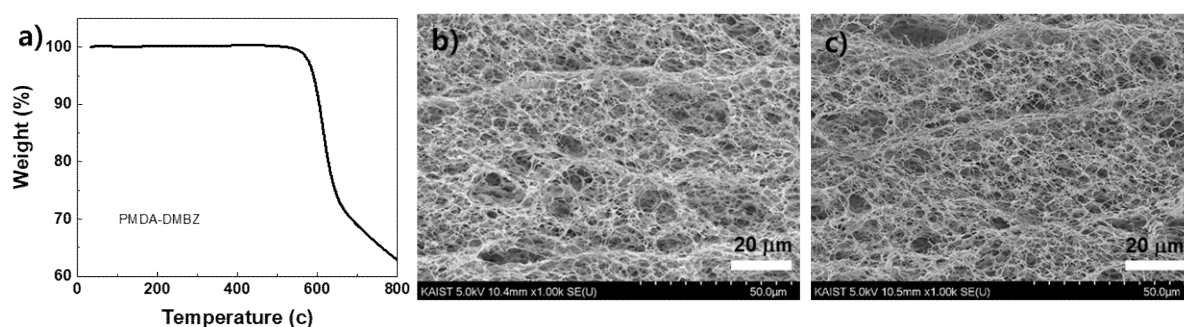

**Figure S2.** (a) TGA Thermograph of PMDA-DMBZ based PI porous separator and cross-sectional SEM images of (b) pristine PI separator and (c) after 250 °C heat treatment.

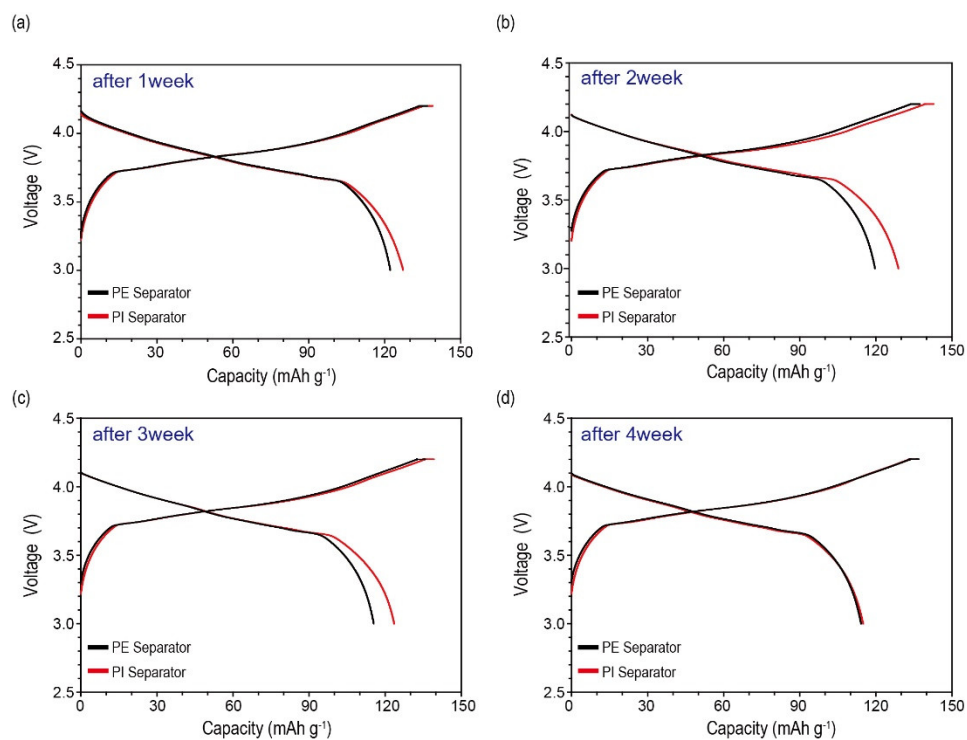

**Figure S3.** Voltage profiles of stored Li metal half cells corresponding to Figure 5.
